# Supplementary material
Source: PubMed Central journal article supplement (PMC2957202)
Supplement: emboj2010193s1.pdf [file emboj2010193s1.pdf]

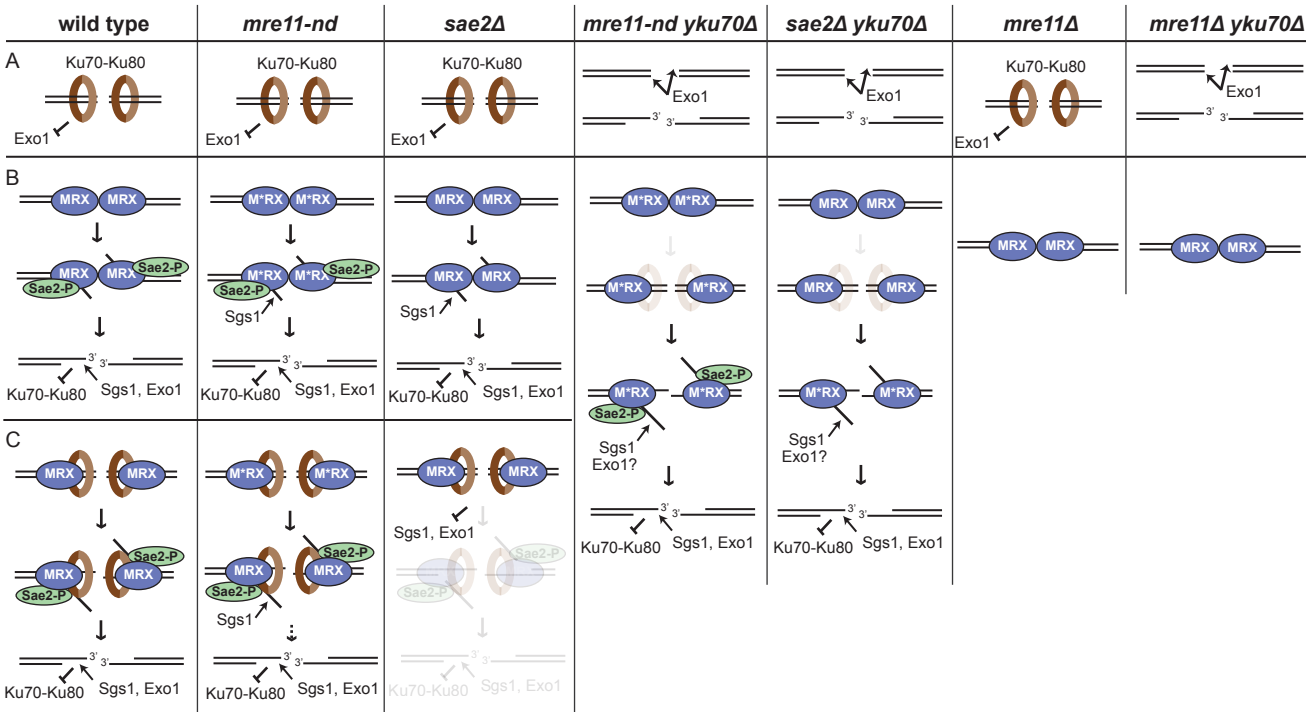

**Figure 7:** Models for the interplay between resection machinery and Ku at DSB ends. In wild type cells DSBs can exist in three dynamic states: (A) Ku-bound, which blocks access to Exo1, (B) MRX-bound which can initiate end-processing and (C) MRX/Ku-bound, which can initiate NHEJ and removal of Ku is required to allow resection initiation. Recruitment of Sae2 in G2 and clipping of the ends allows access to the processive resection machinery and creates an intermediate that can no longer convert states and commits to HR. In nuclease defective mutants of Mre11, though compromised for initial processing, the presence of Sae2 channels ends to HR and redundant activity from Sgs1-Dna2 allows initiation of resection. In the absence of SAE2, the MRX-bound ends can still initiate resection, presumably with some assistance by Sgs1, whereas the Ku-bound and MRX-Ku-bound ends are blocked. When the end protection by Ku is lost, in *mre11-nd yku70Δ* and *sae2Δ yku70Δ* for example, MRX-naked ends can be resected by Exo1. For the MRX-bound ends even if compromised for the initial clipping, the absence of Ku allows Sgs1 (and maybe Exo1) to assist in initiating resection of the DSB. Finally in the absence of Mre11, where the only state present is the Ku-bound state, access of Exo1 is blocked in a Ku-dependent manner.

TABLE 1. Yeast strains

| Strain     | Genotype <sup>a</sup>                                   | Source                      |
|------------|---------------------------------------------------------|-----------------------------|
| W1588-4C   | <i>MATa</i>                                             | R. Rothstein                |
| W1588-4A   | <i>MATα</i>                                             | R. Rothstein                |
| YHK595-3B  | <i>MATa rad51::LEU2</i>                                 | H. Klein                    |
| LSY0624    | <i>MATa exo1::URA3</i>                                  | (Kirkpatrick et al, 2000)   |
| LSY0779    | <i>MATa mre11::LEU2</i>                                 | (Moreau et al, 1999)        |
| LSY0782    | <i>MATα mre11-H125N::URA3::mre11-H125N</i>              | (Moreau et al, 2001)        |
| LSY0785    | <i>MATa hdf1::HIS3</i>                                  | This study                  |
| LSY0793    | <i>MATa mre11::LEU2 hdf1::HIS3</i>                      | This study                  |
| LSY0797    | <i>MATa mre11-H125N::URA3::mre11-H125N hdf1::HIS3</i>   | This study                  |
| LSY0798    | <i>MATα mre11-H125N::URA3::mre11-H125N hdf1::HIS3</i>   | This study                  |
| LSY1009    | <i>MATα ade3::GAL1-HO</i>                               | This study                  |
| LSY1091    | <i>MATa sae2::KANMX6</i>                                | This study                  |
| LSY1092    | <i>MATα sae2::KANMX6</i>                                | (Mimitou & Symington, 2008) |
| LSY1199    | <i>MATα dnl4::URA3</i>                                  | H. Klein                    |
| LSY1200-1D | <i>MATa rad51::LEU2 hdf1::HIS3</i>                      | (Morgan et al, 2002)        |
| LSY1419    | <i>MATα exo1::HIS3 mre11-H125N</i>                      | (Lam et al, 2008)           |
| LSY1428    | <i>MATa mre11::KIURA3 exo1::HIS3</i>                    | This study                  |
| LSY1475    | <i>MATa sgs1::HIS3</i>                                  | This study                  |
| LSY1606    | <i>MATa rad27::TRP1</i>                                 | This study                  |
| LSY1661    | <i>MATα rad55::HIS3 ade2-ISceI</i>                      | (Mozlin et al, 2008)        |
| LSY1709-9D | <i>MATα rad51::LEU2 ade2-n::TRP1::ade2-I lys2::GAL-</i> | (Mimitou &                  |

|              |                                                                                                                         |                             |
|--------------|-------------------------------------------------------------------------------------------------------------------------|-----------------------------|
|              | <i>ISCEI</i>                                                                                                            | Symington, 2008)            |
| LSY1805-2A   | <i>MATa sae2::KANMX6 mre11-H125N::URA3::mre11-H125N</i>                                                                 | This study                  |
| LSY1805-23C  | <i>MATa sae2::KANMX6 exo1::HIS3</i>                                                                                     | This study                  |
| LSY1879-3B   | <i>MATα rad51::LEU2 exo1::HIS3 mre11-H125N::URA3::mre11-H125N ade2-n::TRP1::ade2-ISceI lys2::GAL-ISCEI</i>              | This study                  |
| LSY1880-36A  | <i>MATα rad51::LEU2 mre11-H125N::URA3::mre11-H125N ade2-n::TRP1::ade2-ISceI lys2::GAL-ISCEI</i>                         | This study                  |
| LSY1975      | <i>MATa sgs1::HPHMX4</i>                                                                                                | (Mimitou & Symington, 2008) |
| LSY2012      | <i>MATa sgs1::HPHMX4 exo1::HIS3</i>                                                                                     | (Mimitou & Symington, 2008) |
| LSY2130      | <i>MATa mre11-H125N::URA3::mre11-H125N exo1::HIS3 hdf1::LEU2</i>                                                        | This study                  |
| LSY2132      | <i>MATα hdf1::LEU2 sae2::KANMX6</i>                                                                                     | This study                  |
| LSY2134      | <i>MATα exo1::HIS3 hdf1::LEU2 sae2::KANMX6</i>                                                                          | This study                  |
| LSY2146-5D   | <i>MATa sgs1::HPHMX4 mre11-H125N::URA3::mre11-H125N</i>                                                                 | This study                  |
| LSY2146-9B   | <i>MATa sgs1::HPHMX4 mre11-H125N::URA3::mre11-H125N hdf1::HIS3</i>                                                      | This study                  |
| LSY2147-4A   | <i>MATα sgs1::HPHMX4 mre11::LEU2</i>                                                                                    | This study                  |
| LSY2147-1C   | <i>MATα sgs1::HPHMX4 mre11::LEU2 hdf1::HIS3</i>                                                                         | This study                  |
| LSY2156-407D | <i>MATa mre11::klURA3 hdf1::LEU2 exo1::HIS3</i>                                                                         | This study                  |
| LSY2157      | <i>MATα mre11-H125N</i>                                                                                                 | This study                  |
| LSY2171-11D  | <i>MATa rad51::LEU2 sgs1::HPHMX4 mre11-H125N::URA3::mre11-H125N ade2-n::TRP1::ade2-ISceI lys2::GAL-ISCEI</i>            | This study                  |
| LSY2171-29A  | <i>MATα rad51::LEU2 sgs1::HPHMX4 hdf1::HIS3 mre11-H125N::URA3::mre11-H125N ade2-n::TRP1::ade2-ISceI lys2::GAL-ISCEI</i> | This study                  |
| LSY2172-24C  | <i>MATa rad51::LEU2 ade3::GAL1-HO</i>                                                                                   | This study                  |

|             |                                                                                       |            |
|-------------|---------------------------------------------------------------------------------------|------------|
| LSY2172-17C | <i>MATa rad51::LEU2 sgs1::HPHMX4 ade3::GAL1-HO</i>                                    | This study |
| LSY2193-16B | <i>MATa rad27::TRP1 hdf1::LEU2</i>                                                    | This study |
| LSY2209-28A | <i>MATa sgs1::HPHMX4 exo1::URA3 hdf1::HIS3</i>                                        | This study |
| LSY2228-52B | <i>MATa rad51::LEU2 sae2::KNMX6 ade3::GAL1-HO</i>                                     | This study |
| LSY2228-40C | <i>MATa rad51::LEU2 sae2::KNMX6 hdf1::HIS3<br/>ade3::GAL1-HO</i>                      | This study |
| LSY2229-3C  | <i>MATa sae2::KNMX6 mre11-H125N::URA3::mre11-<br/>H125N hdf1::HIS3</i>                | This study |
| LSY2245-8C  | <i>MATa sae2::KNMX6 sgs1::HPHMX4 hdf1::HIS3</i>                                       | This study |
| LSY2258-12B | <i>MATa rad51::LEU2 mre11-H125N::URA3::mre11-H125N<br/>hdf1::HIS3 ade3::GAL1-HO</i>   | This study |
| LSY2265-10D | <i>MATa rad51::LEU2 mre11-H125N::URA3::mre11-H125N<br/>ade3::GAL1-HO</i>              | This study |
| LSY2265-8A  | <i>MATa rad51::LEU2 mre11-H125N::URA3::mre11-H125N<br/>sgs1::HPHMX4 ade3::GAL1-HO</i> | This study |
| LSY2275-1D  | <i>MATa sae2::KNMX6 dnl4::URA3</i>                                                    | This study |
| LSY2299-11B | <i>MATa mre11-H125N::URA3::mre11-H125N dnl4::KNMX6</i>                                | This study |
| LSY2305-1C  | <i>MATa mre11::LEU2 dnl4::KNMX6</i>                                                   | This study |

<sup>a</sup> All strains listed are of the W303 genotype (*trp1-1 his3-11,15 can1-100 ura3-1 leu2-3,112 ade2-1*). Only the mating type and differences from this genotype are shown

#### References:

Kirkpatrick DT, Ferguson JR, Petes TD, Symington LS (2000) Decreased meiotic intergenic recombination and increased meiosis I nondisjunction in *exo1* mutants of *Saccharomyces cerevisiae*. *Genetics* **156**: 1549-1557

Lam AF, Krogh BO, Symington LS (2008) Unique and overlapping functions of the Exo1, Mre11 and Pso2 nucleases in DNA repair. *DNA Repair (Amst)* **7**: 655-662

Mimitou EP, Symington LS (2008) Sae2, Exo1 and Sgs1 collaborate in DNA double-strand break processing. *Nature* **455**: 770-774

Moreau S, Ferguson JR, Symington LS (1999) The nuclease activity of Mre11 is required for meiosis but not for mating type switching, end joining, or telomere maintenance. *Mol Cell Biol* **19**: 556-566

Moreau S, Morgan EA, Symington LS (2001) Overlapping functions of the *Saccharomyces cerevisiae* Mre11, Exo1 and Rad27 nucleases in DNA metabolism. *Genetics* **159**: 1423-1433

Morgan EA, Shah N, Symington LS (2002) The requirement for ATP hydrolysis by *Saccharomyces cerevisiae* Rad51 is bypassed by mating-type heterozygosity or RAD54 in high copy. *Mol Cell Biol* **22**: 6336-6343

Mozlin AM, Fung CW, Symington LS (2008) Role of the *Saccharomyces cerevisiae* Rad51 paralogs in sister chromatid recombination. *Genetics* **178**: 113-126
